# Supplementary material for: New red phosphor with a high color purity: controlled synthesis of 3D architectures of YW2O6(OH)3 : Eu
Source: Royal Society of Chemistry journal article supplement (doi:10.1039/b820335k), 2009-01-01
Supplement: b820335k.pdf [file b820335k.pdf]

**Supporting information for**  
**New red phosphor with a high color purity: controlled**  
**synthesis of 3D architectures of  $\text{YW}_2\text{O}_6(\text{OH})_3\text{:Eu}$**

Lin Xu, Chunliang Lu, Jianmin Shen, Yuping Chen, Zihui Zhang and Wenhua Hou\*

Key Laboratory of Mesoscopic Chemistry of MOE, School of Chemistry and Chemical  
Engineering, Nanjing University, Nanjing 210093, P. R. China.

\*Corresponding author. Fax: +86-25-83317761; Tel: +86-25-83686001; E-mail:

[whou@nju.edu.cn](mailto:whou@nju.edu.cn)

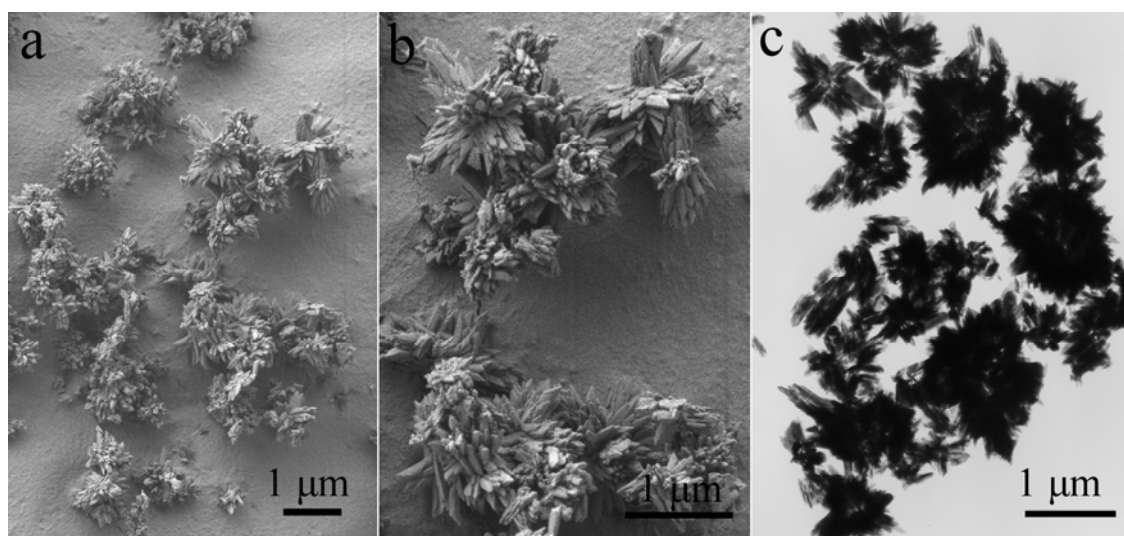

**Supporting information, Fig. S1** SEM and TEM images of  $\text{YW}_2\text{O}_6(\text{OH})_3\text{:Eu}$  obtained at pH=4.

(a) An overall SEM image of the product. (b) High-magnification SEM image of the product. (c) Representative TEM image of the product.
